# Supplementary material for: Dlp-mediated Hh and Wnt signaling interdependence is critical in the niche for germline stem cell progeny differentiation
Source: PubMed Central journal article supplement — Sci Adv. 2020 May 13;6(20):eaaz0480. doi: 10.1126/sciadv.aaz0480 (PMC7220319; doi:10.1126/sciadv.aaz0480), 2020-05-13
Supplement: aaz0480_SM.pdf [file aaz0480_SM.pdf]

[advances.sciencemag.org/cgi/content/full/6/20/eaaz0480/DC1](https://advances.sciencemag.org/cgi/content/full/6/20/eaaz0480/DC1)

## Supplementary Materials for

### **Dlp-mediated Hh and Wnt signaling interdependence is critical in the niche for germline stem cell progeny differentiation**

Renjun Tu, Bo Duan, Xiaoqing Song, Ting Xie\*

\*Corresponding author. Email: [tgx@stowers.org](mailto:tgx@stowers.org)

Published 13 May 2020, *Sci. Adv.* **6**, eaaz0480 (2020)  
DOI: 10.1126/sciadv.aaz0480

#### **The PDF file includes:**

Figs. S1 to S8

#### **Other Supplementary Material for this manuscript includes the following:**

(available at [advances.sciencemag.org/cgi/content/full/6/20/eaaz0480/DC1](https://advances.sciencemag.org/cgi/content/full/6/20/eaaz0480/DC1))

Table S1

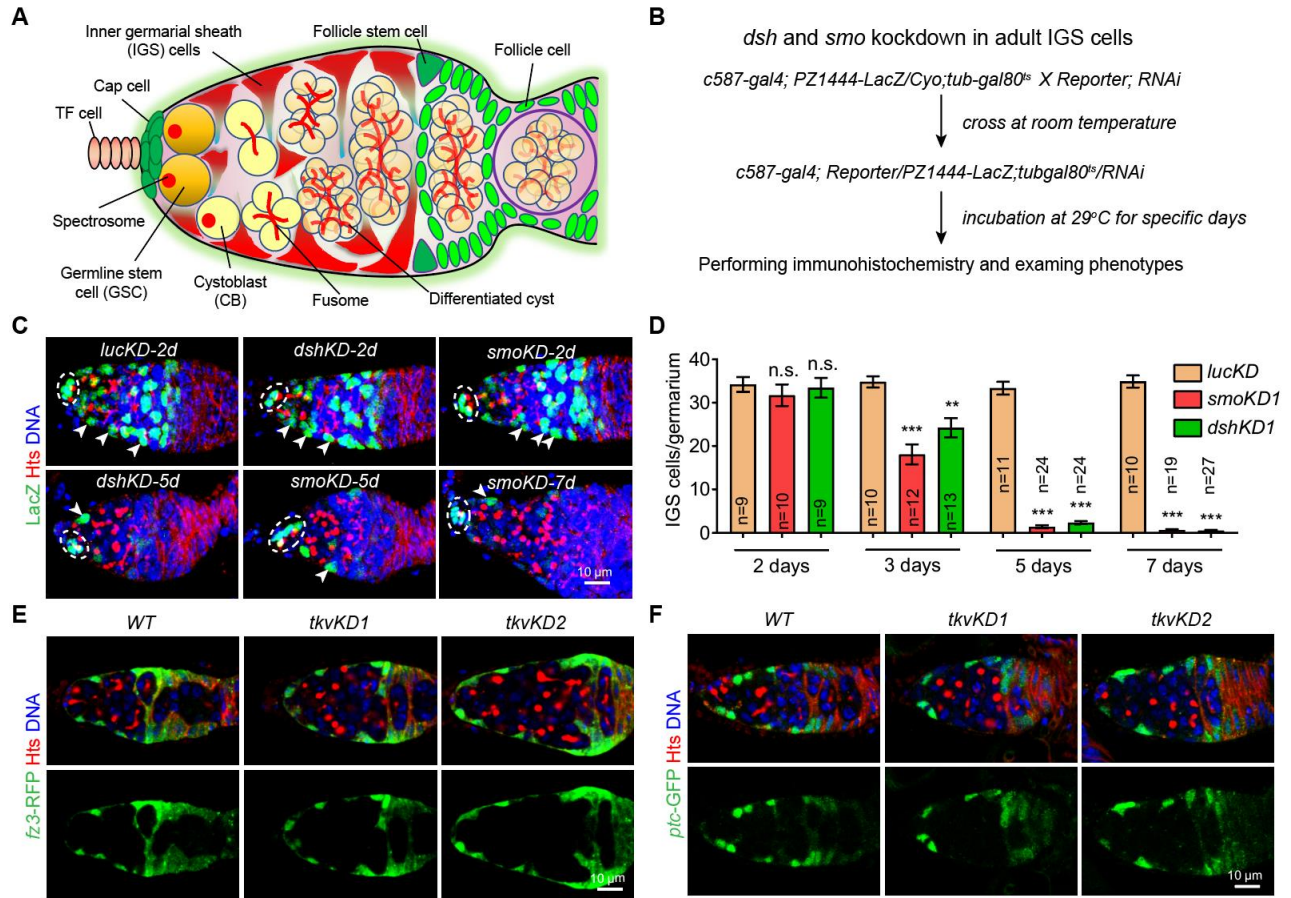

**fig. S1. Wnt and Hh signaling maintain each other's activities in IGS cells, which are independent of the germ cell differentiation defect.** (A) A schematic diagram of a *Drosophila* ovarium, which contains GSCs, cystoblasts (CBs), mitotic cysts (2-cell, 4-cell, and 8-cell cysts) and 16-cell cysts. (B) General experimental strategy used in this study for examining Wnt and Hh signaling activities in adult shRNA knockdown IGS cells using *fz3-RFP* and *ptc-GFP* reporters. (C, D) Merged confocal images labeled for PZ1444-LacZ (green, cap cells and IGS cells) and Hts (red, spectrosomes in GSCs/CBs/SGCs and branched fusomes in cysts) showing that *dshKD* or *smoKD* ovaria have normal number of IGS cells at 2d after knockdown, but only have several of them at 5d or 7d (D: quantification results on IGS cells; n=ovarium number). (E, F) *tkv* knockdown in IGS cells by two independent RNAi lines (*tkvKD1* and *tkvKD2*) causes the dramatic accumulation of excess CB-like cells, but does not have any obvious effect on *fz3-RFP* and *ptc-GFP* expression in IGS cells. Scale bars: 10  $\mu$ m.

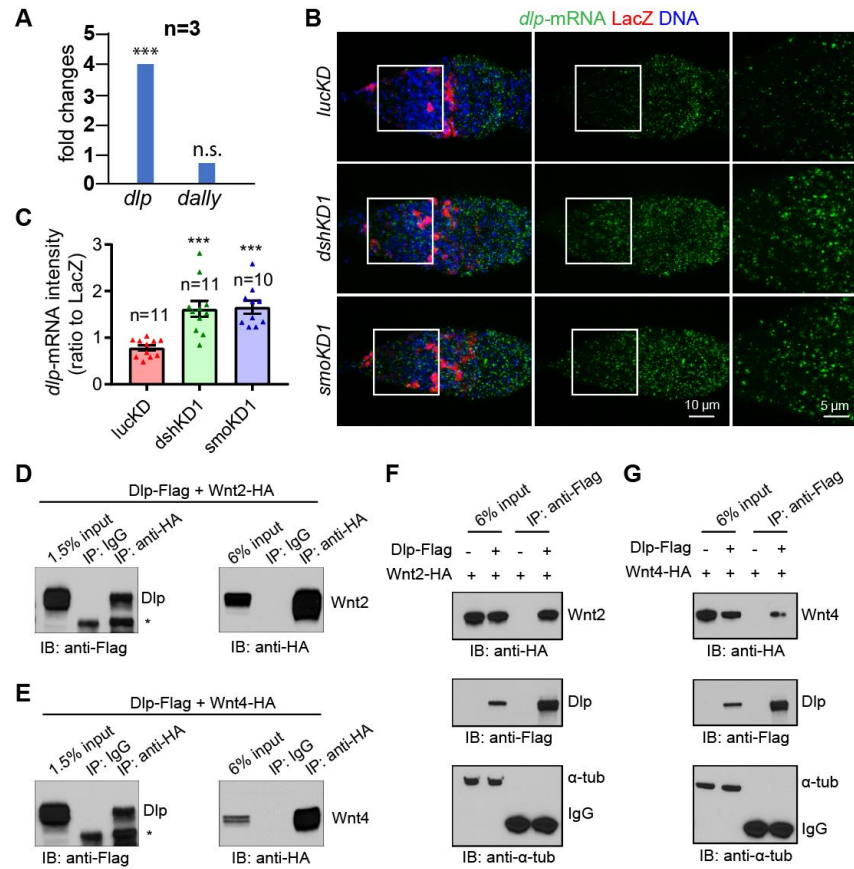

**fig. S2. Hh and Wnt signaling repress the expression of Dlp, which are capable of associating with Wnt2 and Wnt4 protein and promoting BMP signaling.** (A) RNA-seq results showing that *dlp* mRNA levels are significantly increased in *dshKD* IGS cells, while *dally* mRNA levels remain unchanged (n=3 biological replicates). (B, C) FISH confocal images showing that *dlp* mRNA levels are significantly upregulated in *dshKD* and *smoKD* IGS cells (C: quantification results; n=germarial number). (D-G) In S2 cells Wnt2-HA and Wnt4-HA can bring down Dlp-Flag (the mouse anti-HA antibodies are used to perform protein pull-down, and mouse IgG serves as negative controls; \* indicates a non-specific protein band recognized by the anti-Flag antibody), whereas Dlp-Flag can pull down Wnt2-HA or Wnt4-HA ( $\alpha$ -tubulin was used as negative WB control; anti-Flag pull-down for Wnt2-HA or Wnt4-HA single transfection was used as negative IP control). Scale bars: 10  $\mu$ m.

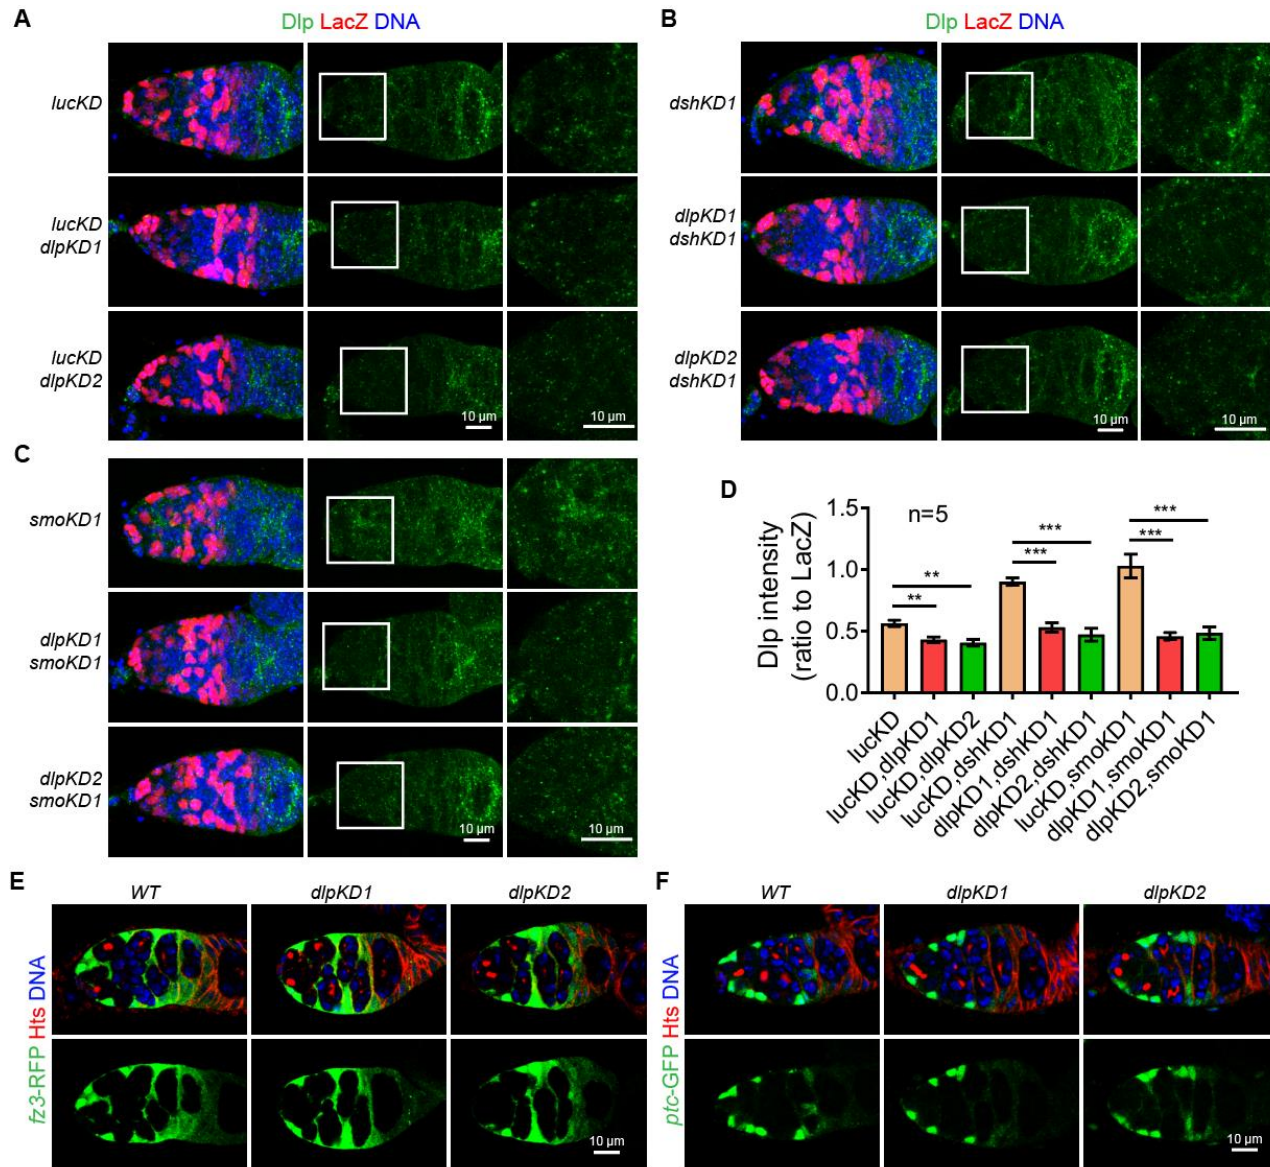

**fig. S3. Endogenous Dlp is dispensable for normal Hh and Wnt signaling activities in IGS cells.** (A-C) *dlp* knockdown by two independent RNAi lines, *dlpKD1* and *dlpKD2*, can efficiently eliminate Dlp protein accumulation in *dshKD1* or *smoKD1* IGS cells (rectangles). (D) Quantification of relative Dlp intensity (n=germarial number). (E and F) *dlp* knockdown in IGS cells does not affect *fz3*-RFP (E) and *ptc*-GFP (F) expression compared to the control. Scale bars: 10  $\mu$ m. Data denote mean $\pm$ s.e.m.

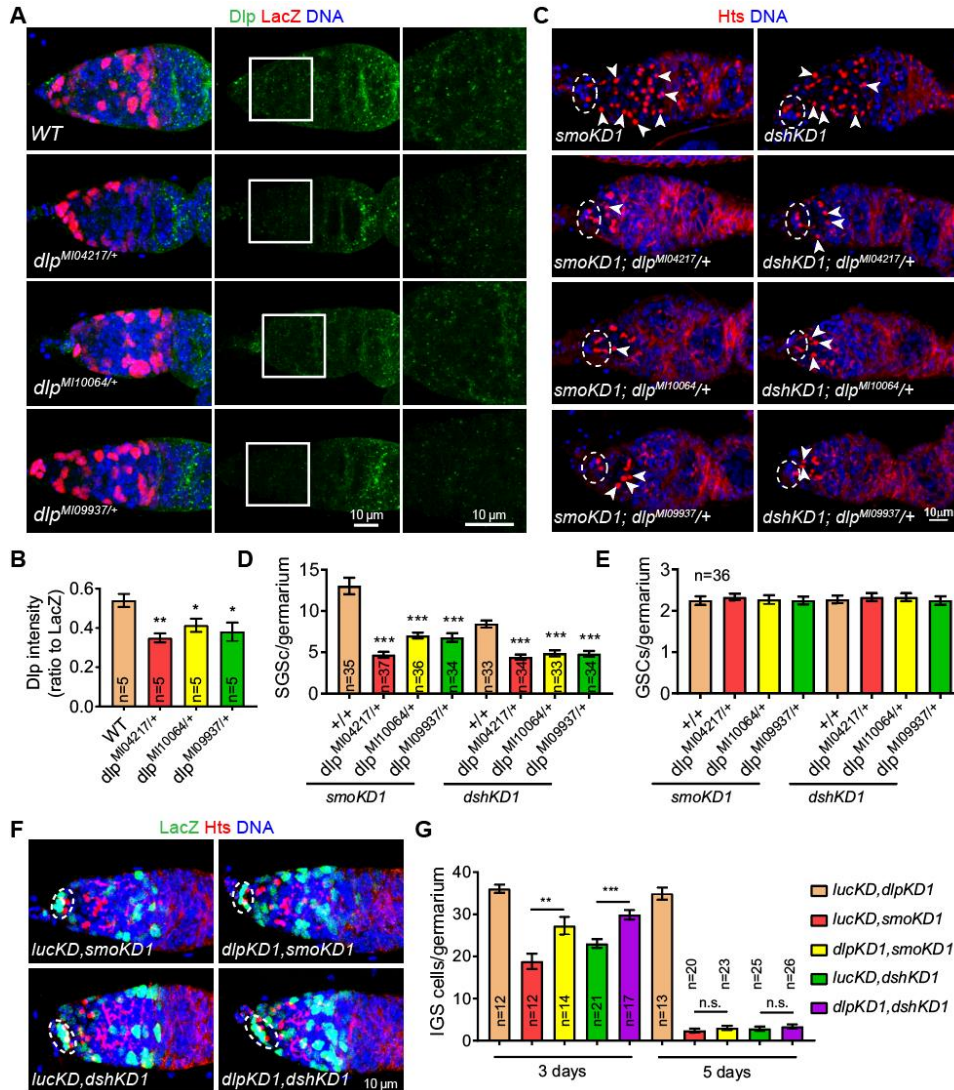

**fig. S4. Reducing the *dlp* dosage can significantly rescue the GSC progeny differentiation defects caused by defective Hh and Wnt signaling.** (A and B) Three Mi[MIC] insertion flies *dlp*<sup>M104217</sup>, *dlp*<sup>M110064</sup> and *dlp*<sup>M109937</sup>, which inserted into *dlp* genome region, showing downregulation of Dlp (D: Dlp intensity quantification results; n=germarial number). (C-E) Broken ovals highlight cap cells and GSCs, whereas arrowheads denote spectrosomes in CBs/SGCs. Reducing the *dlp* gene dosage by *dlp*<sup>M104217</sup>, *dlp*<sup>M110064</sup> and *dlp*<sup>M109937</sup> can significantly decrease the accumulation of SGScs caused by *smoKD1* and *dshKD1* without impacting GSC numbers. (F) CB/SGC and GSC quantification results, respectively (n=germarial number). (F and G) *dlpKD* can partly rescue *dshKD* or *smoKD* induced ISG cells lost at 3d but not 5d (G: quantification results; n=germarial number). Scale bars: 10  $\mu$ m. Data denote mean $\pm$ s.e.m.

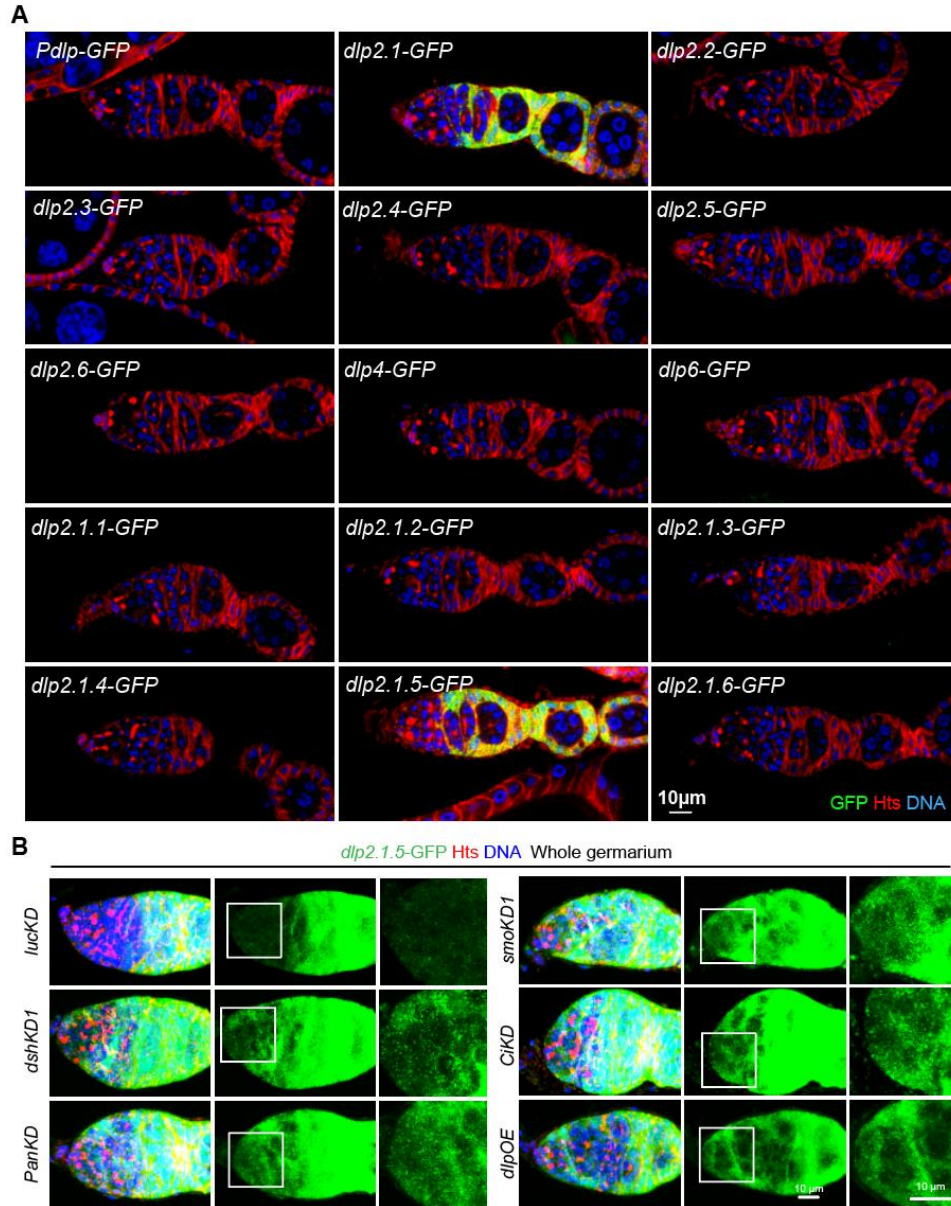

**fig. S5. Defining the genomic region for driving *dlp* expression in the germarium using transgenic GFP reporters.** (A) Only the genomic region, *dlp2.1* in the second intron, is sufficient to recapitulate the *dlp* expression pattern in the germarium, but other genomic regions cannot. A 900-bp genomic fragment, *dlp2.1.5*, can reproduce the expression pattern of *dlp2.1* in the germarium, but other genomic regions cannot. (B) Merged confocal images of germaria showing that *dlp2.1.5-GFP* expression is upregulated in *dshKD1*, *smoKD1*, *panKD*, *ciKD* and *dlpOE* IGS cells compared to the control (*lucKD*) (anterior germarial regions highlighted by squares are shown at a high magnification). Scale bars: 10  $\mu$ m.

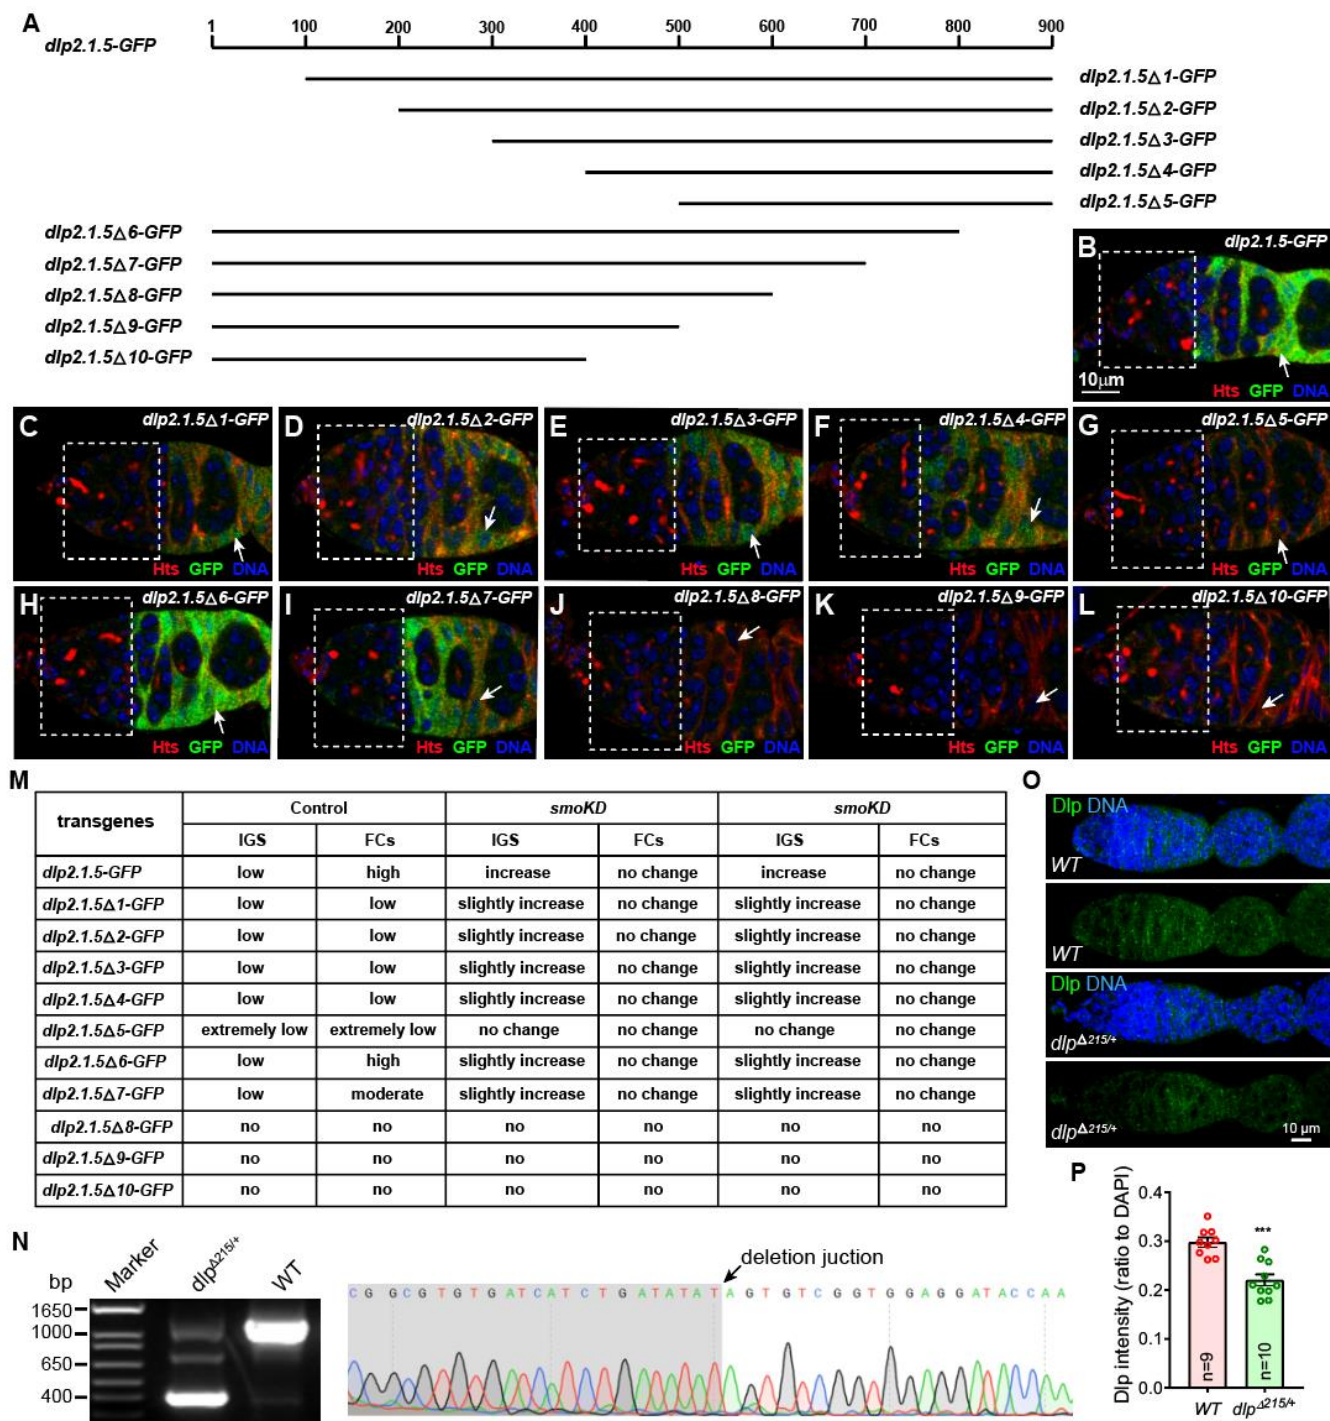

**fig. S6. Nested deletions are used to further define the genomic regions in *dlp2.1.5* responding to Hh/Wnt signaling.** (A) Diagram of the nest deletions for *dlp2.1.5*. (B-L) Compared to *dlp2.1.5-GFP* expression, none of the nested deletions causes the upregulation of GFP in IGS cells (broken rectangles), suggesting that multiple repressive elements are required for repressing *dlp* expression in IGS cells. Interestingly, *dlp2.1.5Δ1-GFP*, *dlp2.1.5Δ2-GFP*, *dlp2.1.5Δ3-GFP*, and *dlp2.1.5Δ4-GFP* show lower GFP expression in follicle cells, while *dlp2.1.5Δ5-GFP* almost completely loses GFP expression in follicle cells, indicating that two potential transcriptional activator elements exist in the 1-100-bp and

400-500-bp regions of *dlp2.1.5*. In addition, *dlp2.1.5Δ7-GFP* exhibits lower GFP expression, while *dlp2.1.5Δ8-GFP*, *dlp2.1.5Δ9-GFP* and *dlp2.1.5Δ10-GFP* completely lose GFP expression in follicle cells, indicating that two additional potential transcriptional activator elements exist in the 700-800-bp and 600-700-bp regions of *dlp2.1.5* (summarized in **Fig. 5C**). **(M)** Summary table for the expression changes of the GFP reporters carrying one of the nested deletions in *smoKD* and *dshKD* IGS cells compared to WT. Three things are worth noting: first, *dlp2.1.5Δ6-GFP* shows normal GFP expression in the control, but is upregulated in the anterior *smoKD* and *dshKD* IGS cells, indicating that the 800-900bp region in *dlp2.1.5* does not contain any repressor and activator elements for *dlp* expression in the germarium; second, *dlp2.1.5Δ1-GFP*, *dlp2.1.5Δ2-GFP*, *dlp2.1.5Δ3-GFP*, *dlp2.1.5Δ4-GFP* and *dlp2.1.5Δ7-GFP* exhibit a moderate decrease in GFP expression in follicle cells, but its upregulation of GFP expression in *smoKD* and *dshKD* IGS cells is also partially comprised; third, *dlp2.1.5Δ5-GFP*, *dlp2.1.5Δ8-GFP*, *dlp2.1.5Δ9-GFP* and *dlp2.1.5Δ10-GFP* do not show any GFP expression in follicle cells, and also fail to be upregulated in *smoKD* and *dshKD* IGS cells. These results indicate that the four potential activating elements are not only responsible for *dlp* expression in follicle cells but also for *dlp* upregulation in *smoKD* and *dshKD* IGS cells. Among them, the one in the 600-700-bp region has the strongest effect. **(N)** PCR and sequencing results confirm the deletion of the 800-bp-long *dlp* regulatory region in the CRISPR-generated *dlp<sup>Δ215</sup>* mutant. **(O, P)** The *dlp<sup>Δ215</sup>/+* heterozygous mutant germarium has low Dlp protein expression in follicle cells compared to the control germarium (**P**: quantification results). Scale bars: 10 μm.



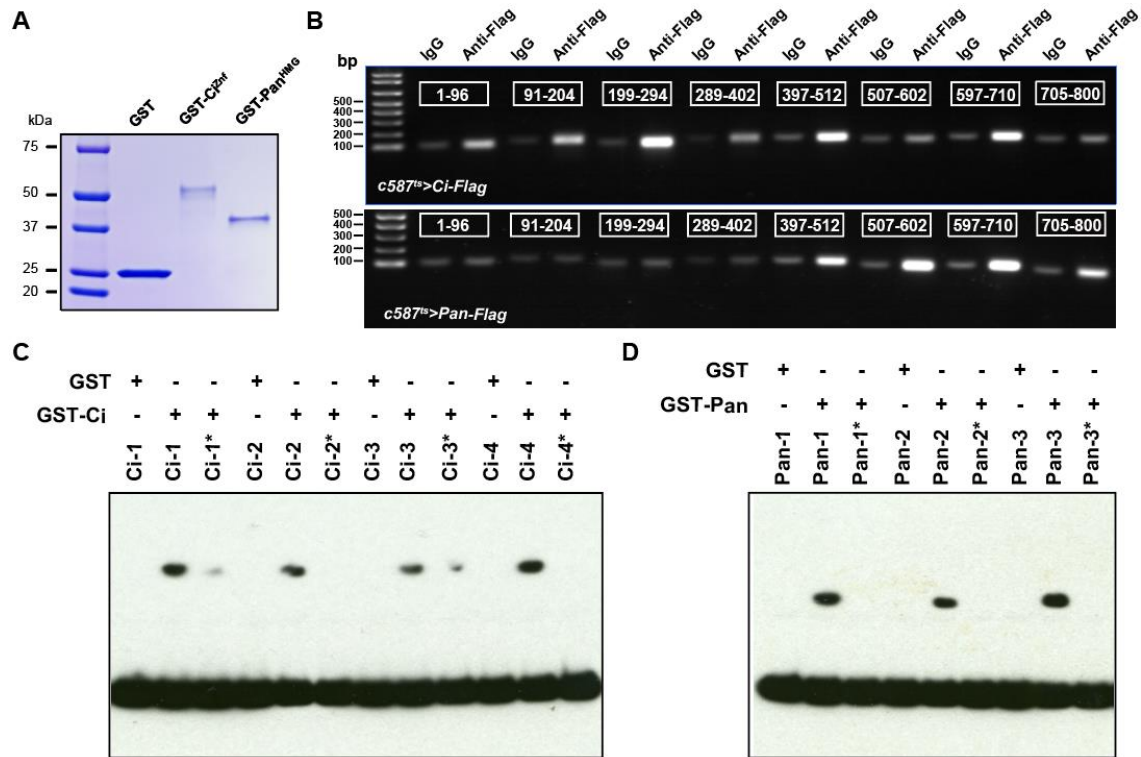

**fig. S7. Ci and Pan bind to multiple sites in the *dlp2.1.5* genomic region.** (A) Bacterially expressed GST, GST-Ci-ZNF (the Ci's zinc finger domain) and GST-Pan-HMG (the Pan's high mobility domain) proteins are purified to homogeneity based on Coomassie blue staining. (B) ChIP-PCR results show that IGS-expressed Flag-Ci is associated *in vivo* with five regions in *dlp2.1.5*, whereas IGS-expressed Flag-Pan binds *in vivo* to four regions in *dlp2.1.5*. (C) EMSA results show that mutated Ci-1\*, Ci-2\*, Ci-3\* and Ci-4\* probes are not able to associate with GST-Ci-ZNF *in vitro*. GST proteins were used as negative control. (D) EMSA results show that mutated Pan-1\*, Pan-2\* and Pan-3\* probes are not able to associate with GST-Pan-HMG *in vitro*. GST proteins were used as negative control.

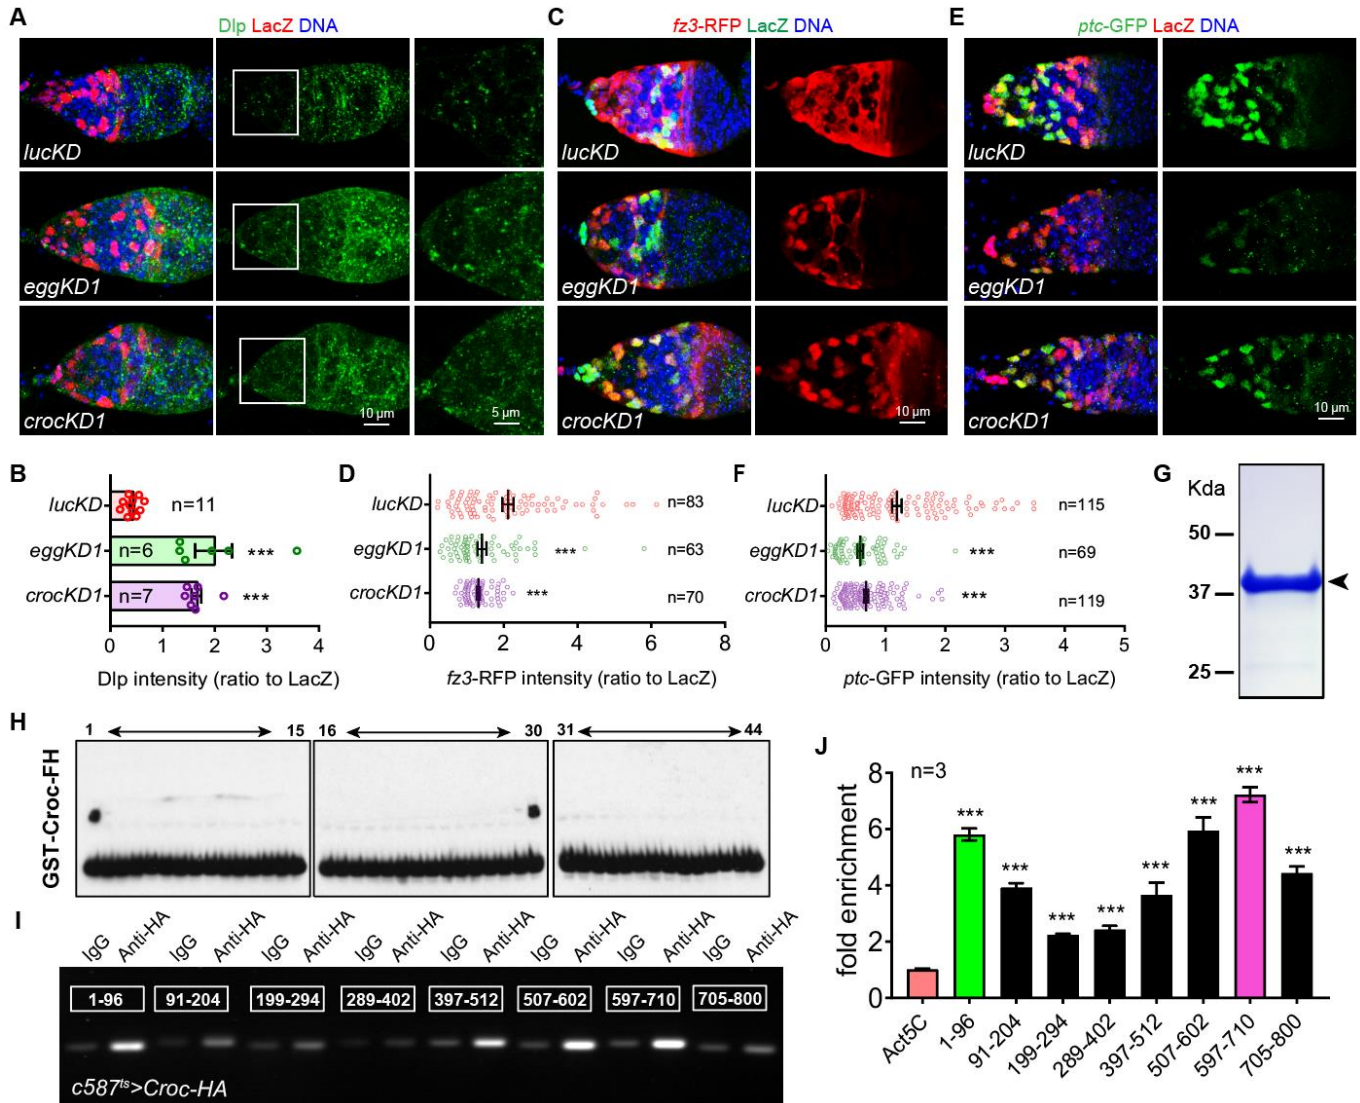

**fig. S8 Croc associates with *dlp2.1.5* and works with Egg to repress *dlp* expression.** (A) Dlp expression is significantly upregulated in *eggKD* and *crocKD* IGS cells (B: quantification results; n=germarial number). (C to F) *fz3-RFP* (C) and *ptc-GFP* (F) are both significantly decreased in *eggKD* and *crocKD* IGS cells (D and F: quantification results respectively, n=IGS cell number). Scale bars: 10  $\mu$ m. Data denote mean $\pm$ s.e.m. (G) Coomassie blue staining of purified GST-Croc-FH protein. (H) EMSA results show that GST-Croc-FH binds to two sites strongly in *dlp2.1.5*. (I and J) ChIP-PCR (I) and ChIP-qPCR (J) results show that IGS-expressed Croc-HA is associated *in vivo* with *dlp2.1.5*.
